# Supplementary material for: A Novel Mcl-1 Inhibitor Synergizes with Venetoclax to Induce Apoptosis in Cancer Cells
Source: Research Square preprint supplement (doi:10.21203/rs.3.rs-1408794/v1), 2022-03-03
Supplement: Supplementary file 1 [file 3e2e746d35a3155540e8af00.docx]

Supporting information for

**A novel Mcl-1 inhibitor synergizes with venetoclax to induce apoptosis in cancer cells**

Tianming Zhao1†, Huien Zhan1†, Shurong Xie1†, Cheng Jiang2, Shengbin Lin3, Ling Tian3, Fangshu Liu1, Hui Zeng1*, Guo Chen3,4*

*Correspondence: androps2011@hotmail.com; gchen84@jnu.edu.cn

†Tianming Zhao, Huien Zhan, Shurong Xie are equally contributed to this work.

1Department of Hematology, The First Affiliated Hospital of Jinan University, Jinan University, Guangzhou 510632, China

2Jiang Su Key Laboratory of Drug Design and Optimization, Department of Medicinal Chemistry, China Pharmaceutical University, Nanjing 210009, China

3Department of Medical Biochemistry and Molecular Biology, School of Medicine Jinan University, Guangzhou 510632, China

4School of Biopharmacy China Pharmaceutical University, Nanjing 211198, China

**Supporting methods**

**Cell viability:**The anti-tumor efficacy of MI-238 against AML cells was determined by Cell Counting Kit-8 (CCK-8, Dojindo, Japan). AML cells were cultured in 1640 or IMDM medium (Biological Industries, USA) supplied with 5% fetal bovine serum (Biological Industries, USA) at 37°C in an atmosphere containing 5% carbon dioxide. For CCK-8 assay, 100μl medium containing 2 × 104 cells were seeded into 96-well culture plates and treated with MI-238 at different concentrations. Vehicle control was treated with DMSO. After 48 h treatment, 10 μl of CCK-8 solution was added to each well, and the incubation continued for 2 h at 37°C. Absorbance was read at 450 nm using a Varioskan LUX. The IC50 of the compound was calculated with GraphPad Prism software 8.0 (GraphPad, San Diego, CA, USA).

**Calculation of combination index:**

The combination index (CI) values were analyzed using CompuSyn software, which has been used extensively to evaluate the compound-induced cytotoxicity synergy. CI value > 1 are considered to be antagonistic effects and CI value < 1 indicates synergistic effect. Strength of synergism can be defined as follows: CI value < 0.1 very strong synergism, CI value = 0.1-0.3 strong synergism; CI value = 0.3-0.7 moderate synergism; CI value = 0.7-0.9 slight synergy; CI value = 0.9–1.0 purely additive effect.

**Cell fractionation:**

Cytoplasmic and mitochondrial proteins were extracted to detect the localization of cytochrome C using Cytoplasmic and Mitochondrial Protein Extraction Kit (Sangon Biotech, Shanghai, China) according to the manufacture’s protocol. Briefly, 2×107 AML cells were collected and washed twice with cold PBS. Samples were resuspended with protein extraction buffer supplemented with protease inhibitor, phosphatase inhibitor and DTT, and homogenized for 30-50 times on ice. The resulting cell lysates were centrifuged for 30 minutes at 12000rpm. The pellet represents the mitochondria and the supernatant contains cytoplasmic proteins.The above two fractions were used for Western blot to detect cytochrome C.

**Fluorescence polarization (FP) assay:**

Mcl-1 recombinant protein (50 nM) was incubated with 5 nM of fluorescent Bak BH3 peptide (TAMRA-GQVGRQLAIIGDDINR) in the absence or presence of increasing concentrations of MI-238 in the binding buffer [50 mM Tris (pH 8.0), 150 mmol/L NaCl, 0.1% bovine serum albumin (BSA), and 5 mM DTT] in black 1,536-well microplates. Plates were incubated at room temperature for 1h and FP values (in millipolarization units) were measured using Envision multi-label plate reader (Perkin Elmer). The excitation filter was at 540 ± 20 nM and emission filter at 590 ± 20 nM. Data analysis and inhibitory constant (Ki) value were determined by GraphPad prism software as described.
